# Supplementary material
Source: PubMed Central journal article supplement (PMC4142211)
Supplement: NIHMS611742-supplement-SI.pdf [file NIHMS611742-supplement-SI.pdf]

## 1 Supplemental Materials

### Section 1: Refractive Broadening

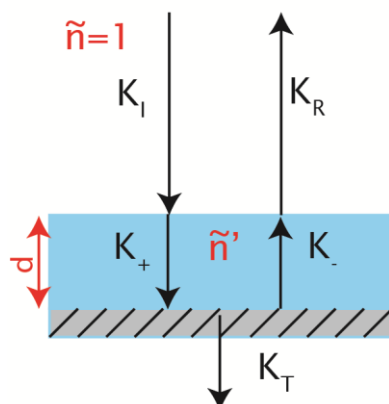

**Figure S1: Sample Geometry.** Shows the simplified geometry used for the calculation for a sample of thickness  $d$ . This three media setup shows wavevectors  $K_I$  and  $K_R$  of the incident and reflected fields in the waveguide (with index  $\tilde{n}=1$ ).  $K_+$  and  $K_-$  are the wavevectors of forward and backward moving waves within the sample, which has a complex, frequency (/field) dependent index of refraction ( $\tilde{n}'$ ). Finally,  $K_T$  is the transmitted wave, which is assumed have zero amplitude as the sample is backed with a metallic mirror. Note the interfaces of the sample holder are ignored.

This section of the supplement describes the background and methodology of extracting the dipolar-broadened linewidth of a resonance at high concentrations, where the measured lineshapes are affected by refractive broadening. This accounts for the same effect known as “propagation effect,” which the authors found treated similarly in literature following submission.<sup>1</sup> Refractive broadening emerges in samples where the high concentration, large polarization and narrow linewidth cooperate to cause an extremely large change in sample susceptibility on resonance. This dramatic change in susceptibility alters the dielectric properties of the sample appreciably. When this occurs, the reflections from the sample are no longer simply proportional to the field-dependent susceptibility response as is the case at lower concentrations. As the 240 GHz EPR spectrometer measures the reflection from the sample (backed by a mirror), this means that when this occurs our measured signal is no longer identical to the field-dependent susceptibility response that we wish to measure. Therefore, we examine a method of determining the susceptibility response by explicitly calculating the reflection with the Fresnel equations. This allows us to approximate the shape of the susceptibility response that generated the measured reflection and use that to estimate the true dipolar-broadened linewidth.

38

#### 39 **1A) Calculation of Reflection from a Paramagnetic Sample**

40 We begin by examining the physical arrangement of our sample as shown in Fig. S1. We  
41 approximate a flat sample of thickness  $d$  on top of a mirror. This ignores the sample holder,  
42 which is made from Teflon, and thus should not have any response to the modulated field. This  
43 also ignores any asymmetry in sample geometry or meniscus formed in the sample. We expect  
44 that, while both effects may be present, this is still a sufficient approximation to develop an  
45 understanding of our spectra.

1 The problem is then reduced to a two interface problem where we must satisfy two  
 2 boundary conditions. The first interface is between air and the sample for the incident and  
 3 reflected waves (given by wavevectors  $K_I$  and  $K_R$ ) and the two waves propagating within the  
 4 sample (wavevectors  $K_+$  and  $K_-$ ). Additionally, the interface between the sample and mirror  
 5 requires the transmitted wave (with wave vector  $K_T$ ) be zero. It is then a straightforward  
 6 calculation to express the reflection from this sample setup as a function of the sample's  
 7 permeability and permittivity.

$$R = \frac{E_R}{E_I} = X + iY = \left[ \frac{e^{2i\phi}(\sqrt{\epsilon_R\mu_{Air}} + \sqrt{\epsilon_{Air}\mu_R}) + (\sqrt{\epsilon_R\mu_{Air}} - \sqrt{\epsilon_{Air}\mu_R})}{e^{2i\phi}(\sqrt{\epsilon_R\mu_{Air}} - \sqrt{\epsilon_{Air}\mu_R}) + (\sqrt{\epsilon_R\mu_{Air}} + \sqrt{\epsilon_{Air}\mu_R})} \right]$$

$$\approx \left[ \frac{e^{2i\phi}(\sqrt{\epsilon_R} + \sqrt{\mu_R}) + (\sqrt{\epsilon_R} - \sqrt{\mu_R})}{e^{2i\phi}(\sqrt{\epsilon_R} - \sqrt{\mu_R}) + (\sqrt{\epsilon_R} + \sqrt{\mu_R})} \right] \quad (S1)$$

10 is the reflected signal calculated from the Fresnel Equations<sup>2</sup> and is a complex number  
 11 containing the in- and out-of-phase response of the spins as X and Y respectively.  $E_R$  and  $E_I$  are  
 12 the electric field strengths of the reflected and incident radiation respectively,  $\phi$  is the phase  
 13 acquired by millimeter-wave radiation when passing through the sample,  $\epsilon_{Air}$  and  $\epsilon_R$  are the  
 14 permittivity of air and the sample respectively, and  $\mu_{Air}$  and  $\mu_R$  are the permeability of air  
 15 and the sample respectively. We can express the phase acquired in terms of the known  
 16 parameters by  $\phi = \frac{\omega d}{c} \sqrt{\epsilon_R\mu_R}$ , where  $d$  is the sample thickness, and  $c$  is the speed of light. We  
 17 make the (accurate) approximation that  $\mu_{Air} \approx \epsilon_{Air} \approx 1$ . To determine the reflections we write  
 18  $\mu_{rel} = 1 + \chi$  where  $\chi = \chi' + i\chi''$  is the complex susceptibility, and we take  $\epsilon_{rel} \approx 3.2$  from the  
 19 permittivity of frozen ice<sup>3</sup>. We approximate the susceptibility response as a simple Lorentzian for  
 20 simplicity and so can write<sup>4</sup>

$$\chi' = \frac{\chi_0 \omega_L}{2} \frac{\omega_L - \omega}{(\omega - \omega_L)^2 + \left(\frac{1}{T_2}\right)^2}$$

$$\chi'' = \frac{\chi_0 \omega_L}{2T_2^*} \frac{1}{(\omega - \omega_L)^2 + \left(\frac{1}{T_2}\right)^2} \quad (S2)$$

24 where  $\chi_0$  is the DC susceptibility of the spins,  $\omega_L$  is the electron Larmor frequency,  $\omega$  is  
 25 the irradiation frequency, and  $T_2$  is the width of the resonance. We emphasize here that  $T_2$  is only  
 26 a manner of characterizing the resonance width of the susceptibility in our approximation of a  
 27 homogeneous, Lorentzian lineshape and does not reflect the phase memory time in our samples.  
 28 By calculating the expected susceptibility response as a function of  $\omega_L$  (which is given by the  
 29 swept magnetic field) this yields  $\phi_R$  and  $\mu_{rel}$  (also as a function of  $\omega_L$ ). Then the expected signal  
 30 (real and imaginary parts) can be calculated as a function of  $\omega_L$  through Eq. S1, giving us a  
 31 calculated spectrum to compare to those measured in experiment.

32 Our input parameters for these calculations are  $\omega_L$ ,  $\omega$ ,  $T_2$ ,  $\chi_0$  and  $d$ . It is clear that  $\omega$  is  
 33 fixed by our irradiation frequency ( $2\pi \cdot 240$  GHz) and  $\omega_L$  is fixed by the external magnetic field,  
 34 which is swept around 8.6 T.  $\chi_0$  is fixed by the spin species ( $S=7/2$  for  $Gd^{3+}$ ), concentration,  
 35 temperature and magnetic field as follows<sup>4</sup>

$$\chi_0 = \frac{N}{V} \mu_0 \beta (g_J \mu_B J)^2 \left( \frac{1}{4J^2} \operatorname{csch}^2 \left( \frac{1}{2} \beta g_J \mu_B B \right) - \frac{(2J+1)^2}{4J^2} \operatorname{csch}^2 \left( \frac{2J+1}{2} \beta g_J \mu_B B \right) \right), \quad (\text{S3})$$

where  $N/V$  is the spin concentration,  $J$  is the spin quantum number,  $g_j$  is the effective  $g$ -value of the spins ( $g_j=1.992$  for  $\text{Gd}^{3+}$ ),  $\mu_B$  is the Bohr Magneton,  $\mu_0$  is the vacuum permeability,  $\beta = \frac{1}{kT}$  is the Boltzmann factor, and  $B$  is the external magnetic field.

### 1B) Evaluating Calculated Spectra for $\bar{r}=1.78$ nm Samples

Estimation of parameters based on calculations are only carried out for the  $\bar{r}=1.8$  nm (50 mM) samples, as mentioned in the manuscript. Although we find sample geometry affects the lineshape of the  $\bar{r}=2.4$  nm (20 mM) and the  $\bar{r}=3.0$  nm (10 mM) samples, it proved difficult to decisively determine estimates of the exact broadening parameter through comparison with calculation. Spectra that demonstrate notable deviations from a typical derivative lineshape are much easier to characterize. At lower concentrations the distinction between refractive broadening and “true” linewidth broadening becomes subtle. Thus, we recognize that refractive broadening is slightly broadening some spectra at  $\bar{r}=2.41$  nm (20 mM) and  $\bar{r}=3.05$  nm (10 mM), where some variability of lineshapes is still observed, but make no attempt to quantify the correct linewidth in these samples.

Nominally, we have only 2 variable parameters, the sample thickness ( $d$ ) and the resonance width ( $T_2$ ). However, the measurement of the magnetic field is done through calibration of the current in a superconducting sweep coil. Thus, the field calibration is not precise enough to be used without modification, and so we must introduce a shifting parameter to maximize overlap of the simulated to experimental spectrum. Finally, although the detection is done in quadrature, the absolute phase is not precisely defined and depends on sample temperature, room temperature and other parameters. Therefore, a 4<sup>th</sup> parameter is necessary to match the phase shift of the collected data. In practice, the experimental spectra are first shifted by hand in post-processing to roughly display a pure absorption and dispersion lineshape by optimizing the symmetry of the spectra. Later, when calculated spectra are generated, their phase and field offsets are varied to achieve maximum overlap with the experimental spectra (as determined by the minimizing the difference between calculated and experimental spectra with the Error discussed below).

As the phase and field shift are not meaningful parameters for this work, we seek only to optimize them at each value of ( $T_2, d$ ), giving us a 2D parameter space to investigate. We adopt the brute force method of generating a series of spectra spanning the reasonable values of these two parameters and determining the error from the magnitude of the difference in real and

$$\text{imaginary parts, i.e. Error} = \frac{\sum_n \sqrt{(X_{Exp} - X_{Calc})^2 + (Y_{Exp} - Y_{Calc})^2}}{N_{Pts}}$$

where  $X$  and  $Y$  represent the in phase and out of phase components, the subscripts  $Exp$  and  $Calc$  referring to experimentally taken spectrum, and spectrum generated from the calculation outlined

1 above. The summation symbol indicates summation over all the points in the spectrum and  $N_{\text{Pts}}$   
2 is the number of data points. As the wings of the experimental lineshapes are not well described  
3 by Lorentzians, the error was only calculated for the center of the spectra, defined by edges just  
4 outside the extrema of the spectra. All the spectra (real and imaginary) are normalized by  
5 intensity before they are compared.

6 We generated error landscapes for a range of parameters which reasonably covered the  
7 experimentally possible configurations. Specifically, sample thicknesses out to  $\sim 3$  mm were  
8 generally considered. However, no reasonable points were found beyond  $\sim 1.5$  mm, which is  
9 consistent with our expectations from sample volumes and holders. The sample thickness,  
10 calculated based on the volumes assuming perfect, cylindrical packing were between  $250 \mu\text{m}$  to  
11  $1.25$  mm in the larger sample holder ( $\sim 4$  mm inner diameter) and was  $\sim 2.5$  mm for the small  
12 holder ( $\sim 2$  mm inner diameter). For the small sample holder (sample 4), the calculated sample  
13 thickness was  $\sim 10\times$  smaller than  $2.5$  mm, suggesting this estimation is inaccurate for this sample  
14 setup. However, for the other samples (all measured in the larger sample holder), we find in  
15 general that larger volumes lead to larger calculated thicknesses. However, the trend is neither  
16 perfect, nor do the absolute thicknesses match, which can likely be explained by the fact that the  
17 approximation of a flat sample is poorly realized given the high sample viscosity encountered  
18 before freezing (resulting in a significant meniscus). While signal intensity does generally  
19 increase with increasing volume, effects due to sample geometry and the short wavelength  
20 compared to sample thickness (particularly for larger volumes) results in a nonlinear relationship  
21 between signal strength and volume, and some variability is encountered based on the quality of  
22 the loading.

23  
24 As a general principle, we wished to investigate the local minima with values near to that  
25 of the global minimum to determine if local minima provided better parameter estimates than  
26 the global minimum, and to gauge the degree of confidence in our parameter estimates. We  
27 restricted our investigation of minima to error values within 250% of the global minimum, to  
28 screen only local minima which provide good agreement with the experimental lines. Thus,  
29 much of the parameter space shown in forthcoming figures is “yellow” indicating a  
30 comparatively high error value. In all cases, excepting one, the global minimum was retained  
31 after reviewing the qualifying local minima. The evaluations of all five experiments are  
32 presented below with a brief discussion in each case evaluating the reasonableness of the  
33 parameters. In all cases, the parameters cited in the manuscript are those for the minima which  
34 are boxed and have a blue arrow. These parameters are then used to determine the linewidth of  
35 the susceptibility response, which is then the linewidth cited in the manuscript.

### 36 37 Sample 1

38 The first sample (shown in Fig. S2A) has a spectrum showing substantial deviation from  
39 a single line, which generated an error landscape with a clear minimum value as shown in Fig.  
40 S2B. Although another local minimum exists (located at  $d \sim 1.3$  mm,  $T_2 \sim 3.5$  ns), the error value  
41 was more than 50% higher than the chosen global minimum, and only the global minimum  
42 reproduced the oscillations in the experimental lineshape well. Calculations with parameters near  
43 this local minimum resulted in spectra with broader features, which smoothed out the oscillations  
44 substantially. Thus, the robust global minimum located at  $d = 928 \mu\text{m}$  and  $T_2 = 4.8$  ns was used,  
45 and the resulting calculated spectrum is shown in Fig. S2A.

46

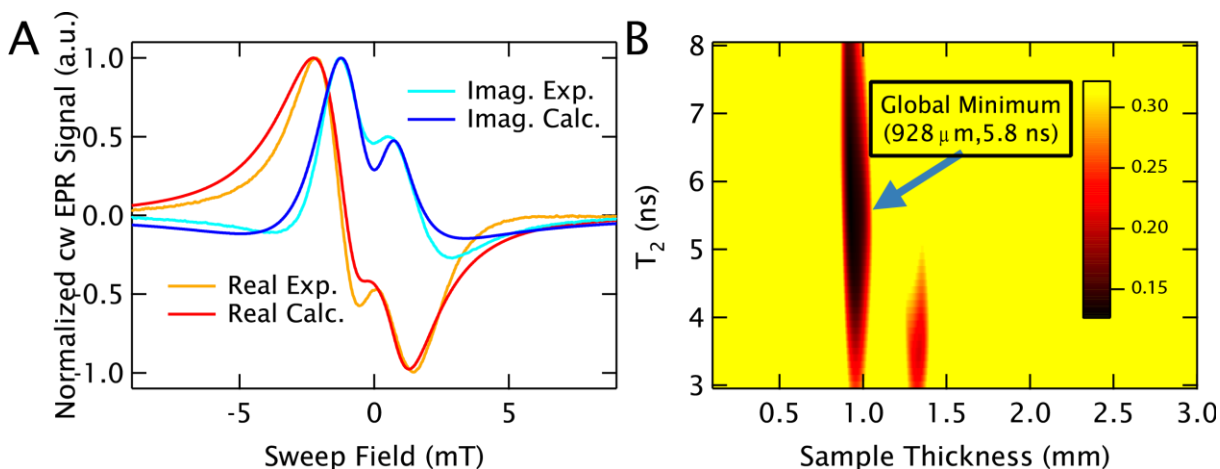

**Figure S2: Sample 1. A:** The real and imaginary parts of the experimental spectrum (Real Exp. and Imag. Exp. respectively) are plotted for sample 1 ( $\bar{r}=1.8$  nm (50 mM)) along with the spectrum calculated from the best fit parameters shown in **B** (Real Calc. and Imag. Calc. respectively). **B:** The error landscape for the experimental spectrum shown in **A** is plotted. The unusual lineshapes provide a simple landscape with one clear, robust global minimum, which described the spectral features better than the visible local minimum. The values of the minimum are shown in the boxed inset text with blue arrow, which provides the parameters for the calculated spectrum shown in **A**.

### 1 Sample 2

2 The experimental spectrum for sample 2 is shown in Fig. S3A and does not display  
3 substantial deviations from a single line as was the case for sample 1, but rather is broadened by  
4 the effects from refractive broadening. Fig. S3B shows an error landscape with both a global and  
5 local minimum. Again, as expected from the error plots, we found that the local minimum  
6 offered a less reliable fit, especially in the wings of the spectrum, where it was substantially  
7 broader. Thus, the global minimum located at  $d=928$   $\mu\text{m}$  and  $T_2=4.8$  ns was used, and the  
8 resulting calculated spectrum is shown in Fig. S3A. However, the differences in lineshape  
9 between the local and global minimum are not as drastic as in the previous case, where obvious  
10 features were missing/obscured.

### 11 Sample 3

12 The spectrum of the third sample is presented in Fig. S4A and leads to a complicated  
13 error landscape. Fig. S4B shows the error landscape with two different local minima in addition  
14 to the global minimum. Although the local minimum at  $d=524$   $\mu\text{m}$  and  $T_2=3.9$  ns produces a  
15 lineshape with a higher error in the central part of the spectrum (compared to the global  
16 minimum), it agrees slightly better in the wings. However, the two local minima and the global  
17 minimum generate spectra which look largely similar; there are no distinguishing features (such  
18 as oscillations) to help in discriminating between them. This helps demonstrate the subtlety of  
19 the problem in the case of 'moderate' effects from refractive broadening, where the effect causes  
20 some broadening of the line, but no dramatic change in the features. Essentially, the broadness of  
21 the line can then result either from refractive broadening (which depend strongly on sample  
22 thickness), or from dipolar broadening (which affects  $T_2$ ). Given that our experimental lines are  
23 already non-Lorentzian, we cannot distinguish well the best possible parameters easily.  
24 However, we note that the volume for this sample was roughly  $\frac{1}{2}$  of that employed in sample 1  
25

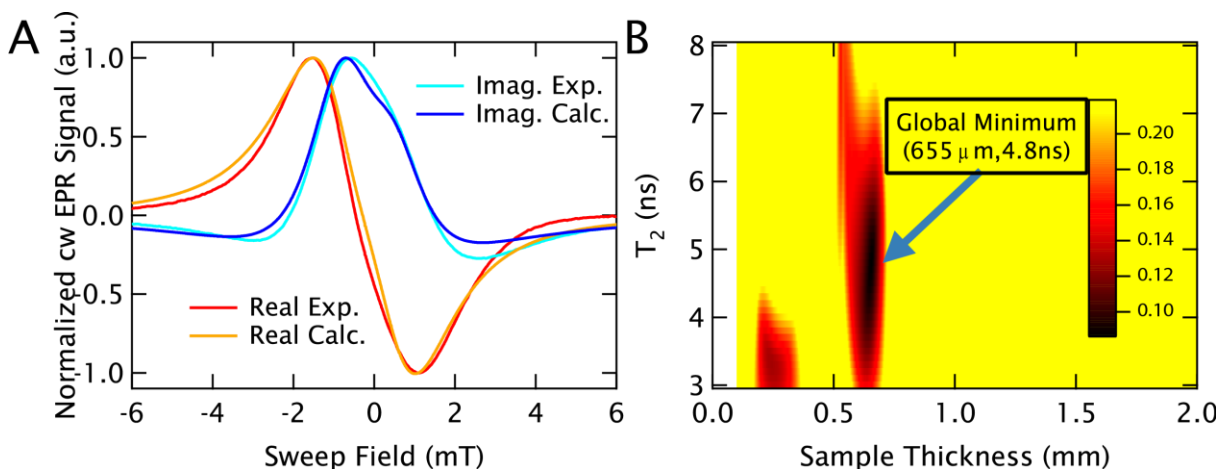

**Figure S3: Sample 2.** **A:** The real and imaginary parts of the experimental spectrum (Real Exp. and Imag. Exp. respectively) are plotted for sample 2 ( $\bar{r}=1.8$  nm (50 mM)) along with the spectrum calculated from the best fit parameters shown in **B** (Real Calc. and Imag. Calc. respectively). **B:** The error landscape for the experimental spectrum shown in **A** is plotted, with a nearby local minimum with a value within 50% of the global minimum (in the lower left of the error landscape). However, as described further in the text, the global minimum better described the spectrum and so was used. The values of the minimum are shown in the boxed inset text with blue arrow, and provide the parameters for the calculated spectrum shown in A.

1 (Fig. S2), using the same sample holder, making  $d \sim 500$   $\mu\text{m}$  a more reasonable physical estimate  
2 of the thickness. Thus, facing the inability to clearly distinguish the quality of parameters purely  
3 from the spectral comparison we reason that that the local minimum at  $d=524$   $\mu\text{m}$  and  $T_2=3.9$  ns  
4 gives a result which is consistent in terms of thickness and has comparable  $T_2$  values with  
5 previous results. Therefore is used as the most reasonable parameter values as shown Fig. S4A.

#### 8 Sample 4

9 The spectrum of the 4<sup>th</sup> sample is shown in Fig. S5A. Although there are no dramatic  
10 deviations from a single line, the error landscape in Fig. S5B offers a clear global minimum that  
11 describes the lineshape well. The nearby local minima offer the correct qualitative lineshape, but  
12 produce error values more than 50% great than the global minimum. In the absence of clear  
13 distinguishing features of the experimental spectrum (such as oscillations), it is difficult to  
14 determine the best spectrum by eye, and so we selected the global minimum at  $d=163$   $\mu\text{m}$  and  
15  $T_2=3.8$  ns. Further, these local minima do not have substantially different  $T_2$  values than the  
16 global minimum, and so would not dramatically alter the estimated linewidth.

17  
18  
19  
20  
21  
22  
23  
24



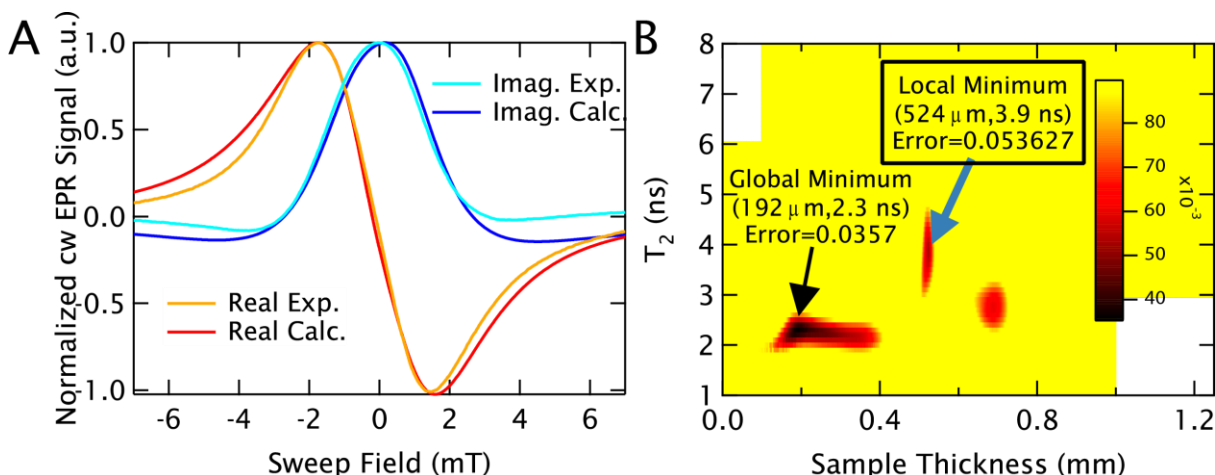

**Figure S4: Sample 3.** **A:** The real and imaginary parts of the experimental spectrum (Real Exp. and Imag. Exp. respectively) are plotted for sample 3 ( $\bar{r}=1.8$  nm (50 mM)) along with the spectrum calculated from the best fit parameters shown in **B** (Real Calc. and Imag. Calc. respectively). **B:** The error landscape for the experimental spectrum shown in **A** is plotted. The error landscape is more complicated than the previous two, with a two local minima which generate spectra similar to that of the global minimum. Although unequivocally justifying one set of parameters was not possible, the local minimum at  $d=524$   $\mu$ m and  $T_2=3.9$  ns is reasoned in the text to be most consistent with previous results and so was chosen. The values of this minimum are shown in the boxed inset text with blue arrow, and provide the parameters for the calculated spectrum shown in A.

1  
2        Sample 5  
3        The 5<sup>th</sup> spectrum shows substantial deviations from a simple line as shown in Fig. S6A.  
4 However, the error landscape, shown in Fig. S6B shows a deep global minimum, and two local  
5 minima which also offer reasonable error values (at  $\sim 0.1$  mm and 1.3 mm). However, local  
6 minimum at  $d \sim 0.1$  mm does not produce any of the oscillations observed in the experimental  
7 spectra. Alternately, the local minimum at  $d \sim 1.3$  mm does present some oscillations, but they do  
8 not agree well with those observed in experiments. Thus, the global minimum at  $d=942$   $\mu$ m and  
9  $T_2=5.5$  ns was used to determine the true linewidth in the presence of refractive broadening, as it  
10 describes the experimental spectrum well.  
11

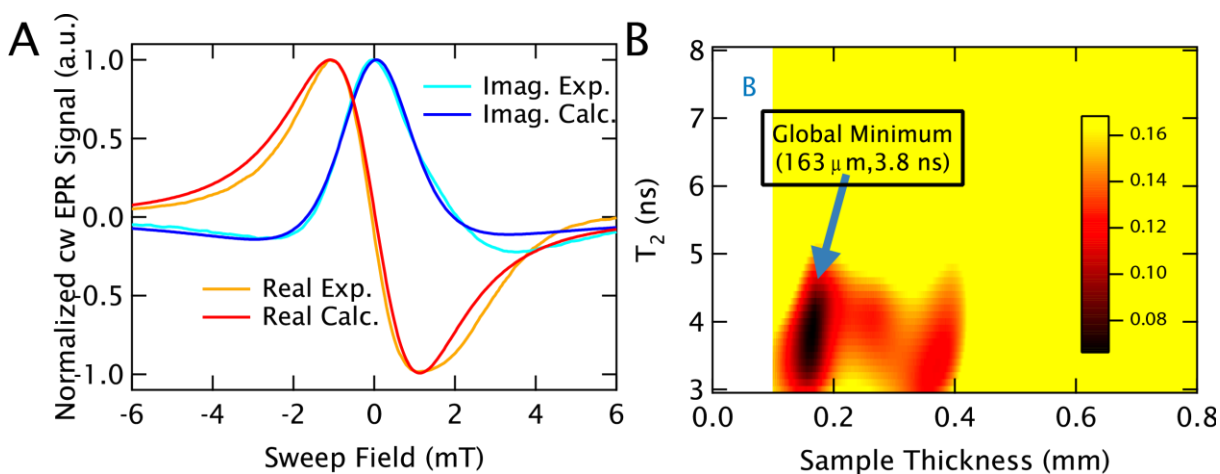

**Figure S5: Sample 4.** **A:** The real and imaginary parts of the experimental spectrum (Real Exp. and Imag. Exp. respectively) are plotted for sample 4 ( $\bar{r}=1.8$  nm (50 mM)) along with the spectrum calculated from the best fit parameters shown in **B** (Real Calc. and Imag. Calc. respectively). **B:** The error landscape for the experimental spectrum shown in **A** is plotted. This error landscape offers a clear global minimum which describes the lineshape well, while the local minima present errors more than 50% above that of the global minimum. The values of the minimum are shown in the boxed inset text with blue arrow, and provide the parameters for the calculated spectrum shown in **A**.

1  
2

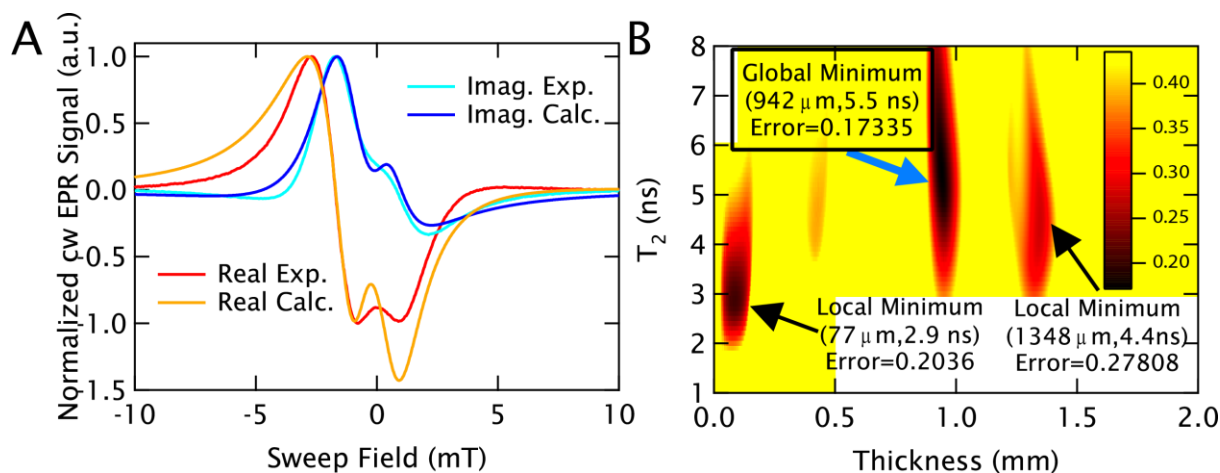

**Figure S6: Sample 5.** **A:** The real and imaginary parts of the experimental spectrum (Real Exp. and Imag. Exp. respectively) are plotted for sample 5 ( $\bar{r}=1.8$  nm (50 mM)) along with the spectrum calculated from the best fit parameters shown in **B** (Real Calc. and Imag. Calc. respectively). **B:** The error landscape for the experimental spectrum shown in **A** is plotted. This error landscape offers a distinct global minimum and two local minima. Although the local minima both provide reasonable error values, neither describes the lineshape features properly, and so the global minimum is used. The values of the minimum are shown in the boxed inset text with blue arrow, and provide the parameters for the calculated spectrum shown in **A**.

3  
4  
5



## 1 Section 2: Temperature Dependent Pake Patterns

2 As discussed in the manuscript, the calculated broadening patterns are generated from  
3 high-spin Pake patterns, which are then averaged over a distance distribution. The breadth of the  
4 broadening is found to fall off with increasing temperature due to the changing of populations of  
5 Zeeman states. This is shown in Fig. S7. The symmetric Pake pattern achieved at 260 K (where  
6 the spin states are all similarly occupied) actually results in a narrower spectrum. This results  
7 from the extremely high polarization of the  $|-5/2\rangle$  and  $|-7/2\rangle$  spin states at 10 K. These two states  
8 have two of the broadest profiles, and so when polarized substantially, they produce very broad  
9 effects. It is also interesting to note that at low temperatures the broadening is clearly shifted and  
10 this should lead to a shift in the resonance going from 10 K to 260 K. This was not investigated  
11 in this study, as a field standard would be necessary.

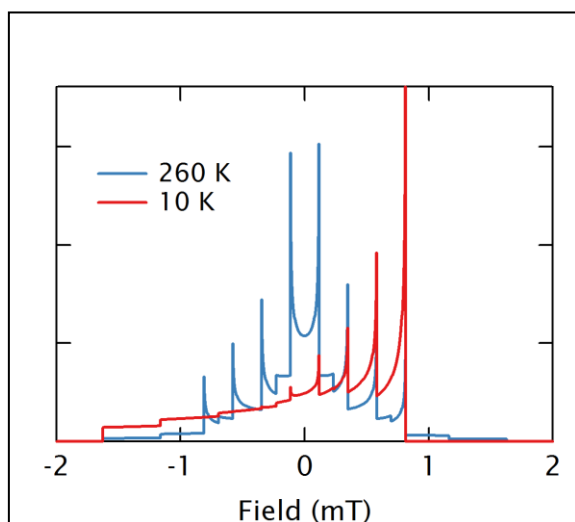

**Figure S7: Temperature Dependence of Pake Patterns.** The Pake patterns describing the interaction of an  $S=7/2$  ion interacting with an  $S=1/2$  spin (as a model for observing only the central transition of the  $Gd^{3+}$  spectrum) at 10 K and 260 K. The far more symmetric pattern at 260 K actually leads to a narrower profile, which explains the reduction in broadening at 260 K.

## Section 3: Estimation of Translational Correlation Time and Motional Averaging of the Dipolar Interaction

We can estimate the translational correlation times from literature where  $\tau \approx a^2/D_f$  where  $a$  is the distance of closest approach for two Gadolinium and  $D_f$  is the diffusion constant of one complex relative to the other. Based on values in the literature<sup>5</sup>,  $\tau \sim 300 - 700$  ps at 298 K in water, which can be scaled by the approximate viscosity difference (140) to  $\tau \sim 42 - 100$  ns. Previous work has shown that dipolar interactions in  $S=1/2$  systems are sufficiently averaged when  $\tau \geq$

$\left(\frac{\mu_0}{4\pi(3\pi g^2 \mu_B^2)}\right)^{-1} r^3 h$ , where  $\mu_0$  is the magnetic constant,  $\mu_B$  is the Bohr magneton,  $h$  is Planck's constant, and  $r$  is the interspin distance. This corresponds to when motion is slow enough that the strongest dipolar anisotropies are not averaged<sup>6, 7</sup>. As in estimating the distance limits, we approximate the broadening of the  $S=7/2$  to be  $\sim 3.5$  times larger than for  $S=1/2$ , thus scaling the cutoff distance time by  $(3.5)^{1/3}$ , and suggesting that the dipolar interaction is static for distances shorter

34 than at least 4.1 nm (and up to 5.2 nm if the longer correlation time of  $\sim 100$  ns is used).

35  
36  
37  
38  
39

1  
2  
3  
4  
5  
6  
7  
8  
9  
10  
11  
12  
13  
14  
15

## References

1. D. Friselli, C.-A. Massa, M. Martinelli, L. Pardi and I. Ricci, *Inorganica Chimica Acta*, 2008, **361**, 4164-4166.
2. J. Jackson, *Classical Electrodynamics Third Edition*, Wiley 1998.
3. J. H. Jiang and D. L. Wu, *Atmospheric Science Letters*, 2004, **5**, 146-151.
4. J. Solyom, *Fundamental of the Physics of Solids* 2007.
5. D. H. Powell, O. M. N. Dhubhghaill, D. Pubanz, L. Helm, Y. S. Lebedev, W. Schlaepfer and A. E. Merbach, *Journal of the American Chemical Society*, 1996, **118**, 9333-9346.
6. C. Altenbach, K.-J. Oh, R. J. Trabanino, K. Hideg and W. L. Hubbell, *Biochemistry*, 2001, **40**, 15471-15482.
7. H. S. McHaourab, K. J. Oh, C. J. Fang and W. L. Hubbell, *Biochemistry*, 1997, **36**, 307-316.
